# Supplementary material for: Kctd7 deficiency induces myoclonic seizures associated with Purkinje cell death and microvascular defects
Source: PubMed Central journal article supplement (PMC9509889; doi:10.1242/dmm.049642), 2022-09-13
Supplement: dmm-15-049642-s1.pdf [file dmm-15-049642-s1.pdf]

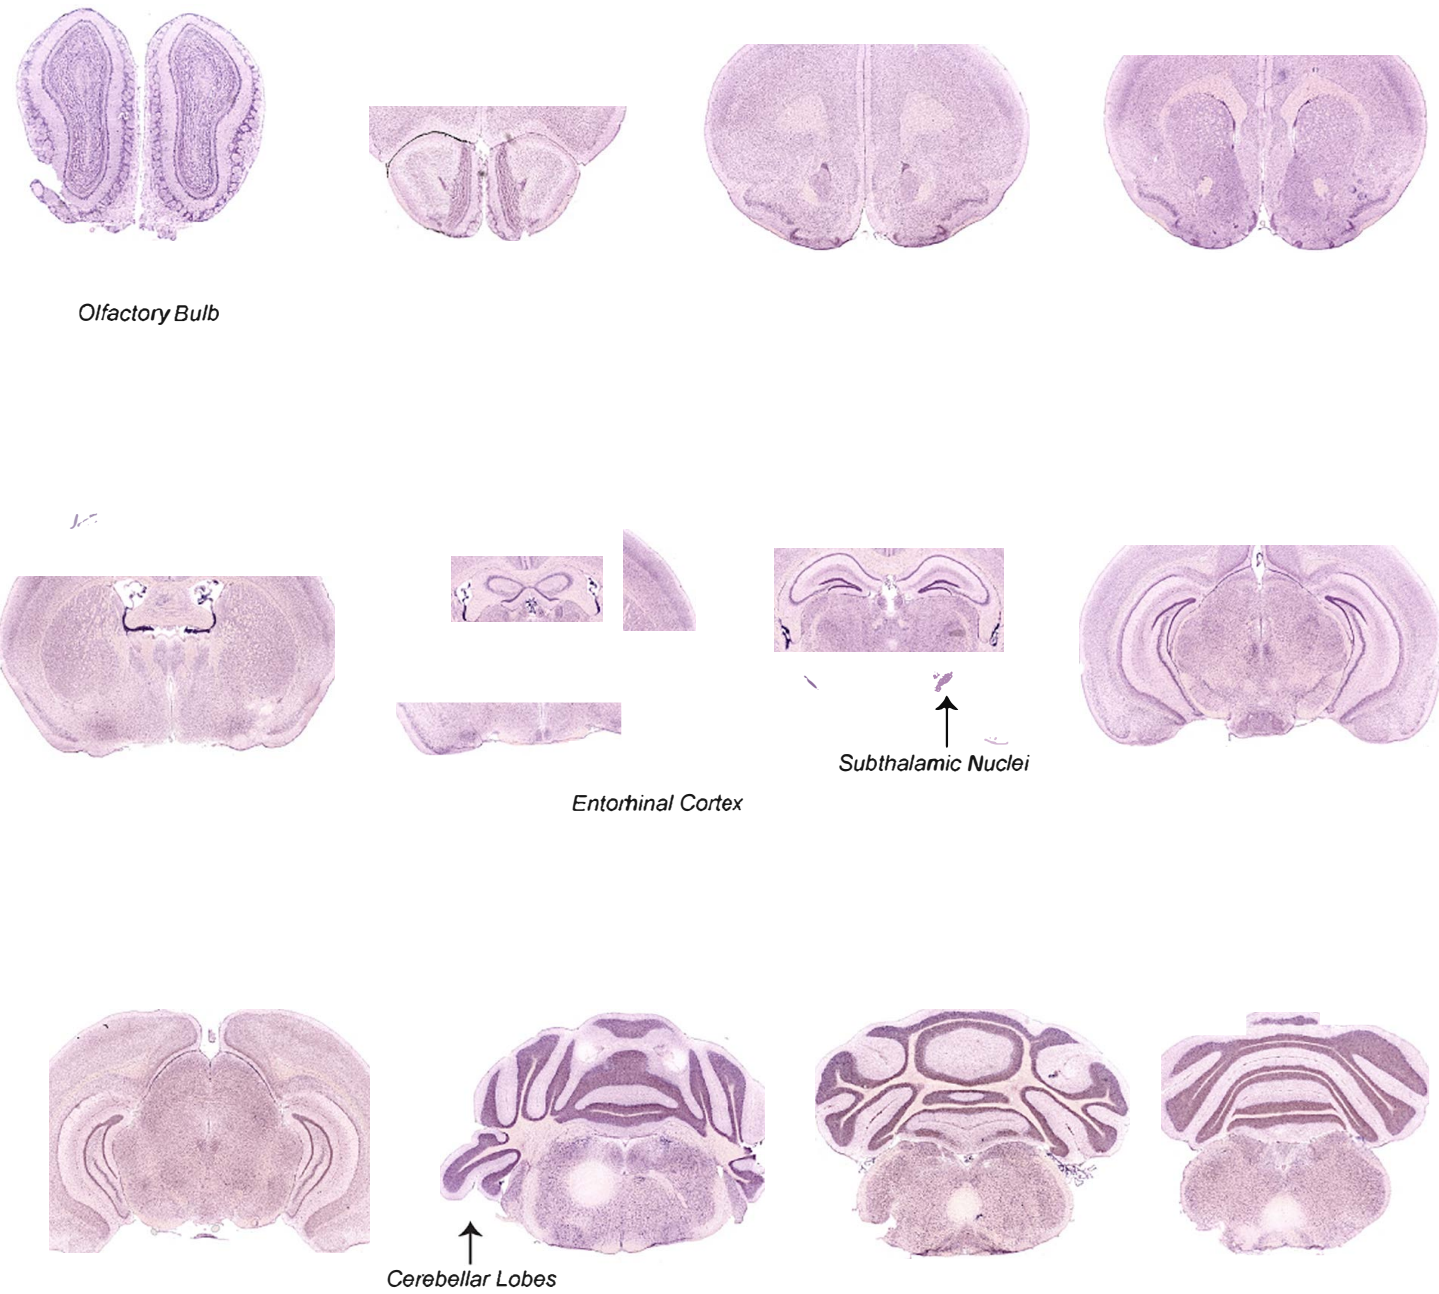

**Fig. S1. *Kctd7* expression pattern in coronal brain sections.** The localization of *Kctd7* is shown in coronal sections of wild-type adult mouse brain by *in situ* hybridization. *Kctd7* was notably enriched in the olfactory bulb, hippocampus, cerebellum, entorhinal cortex, and subthalamic nuclei.

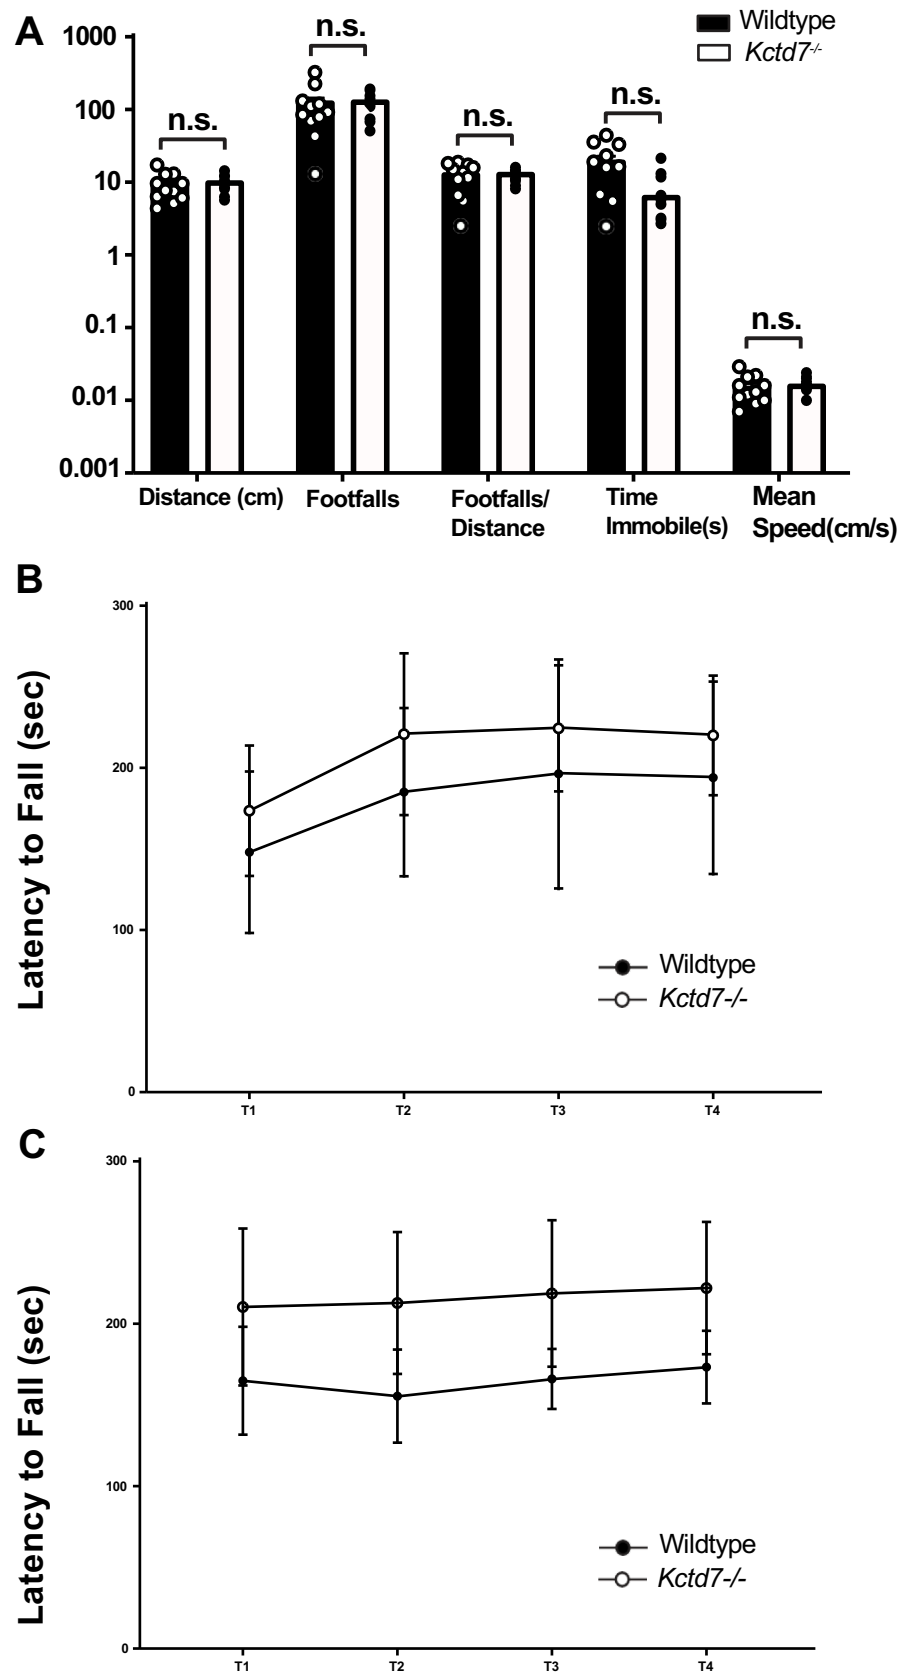

**Fig. S2. *Kctd7*<sup>-/-</sup> mice do not show marked motor function deficits at 2 and 5 months of age. (A-B).** The parallel rod footslip and the accelerating rotarod test were performed on 2 month wildtype ( $n = 11$  and  $n = 8$ , respectively) and *Kctd7*<sup>-/-</sup> ( $n = 12$  and  $n = 9$ , respectively) mice. A footslip is detected when a paw touches a metal plate below the parallel rod floor. *Kctd7*<sup>-/-</sup> mice showed largely normal motor function as measured by this behavioral assay, with a small but insignificant decrease in the immobile time (A). Similarly, no significant deficits were noted in the latency to fall time for 2 month *Kctd7*<sup>-/-</sup> animals (B). (C) Accelerating rotarod analysis was also performed on 5- month-old mice wild-type ( $n = 5$ ) and *Kctd7*<sup>-/-</sup> mice ( $n = 8$ ). T values represent the standardized increasing acceleration speed. No significant defects were noted in the latency to fall time for 5 month *Kctd7*<sup>-/-</sup> animals. Data are represented as the mean  $\pm$  the s.e.m. \*\*\*  $P < 0.001$ , \*\*  $P < 0.01$ , \*  $P < 0.05$ , 2-way ANOVA test for significance.

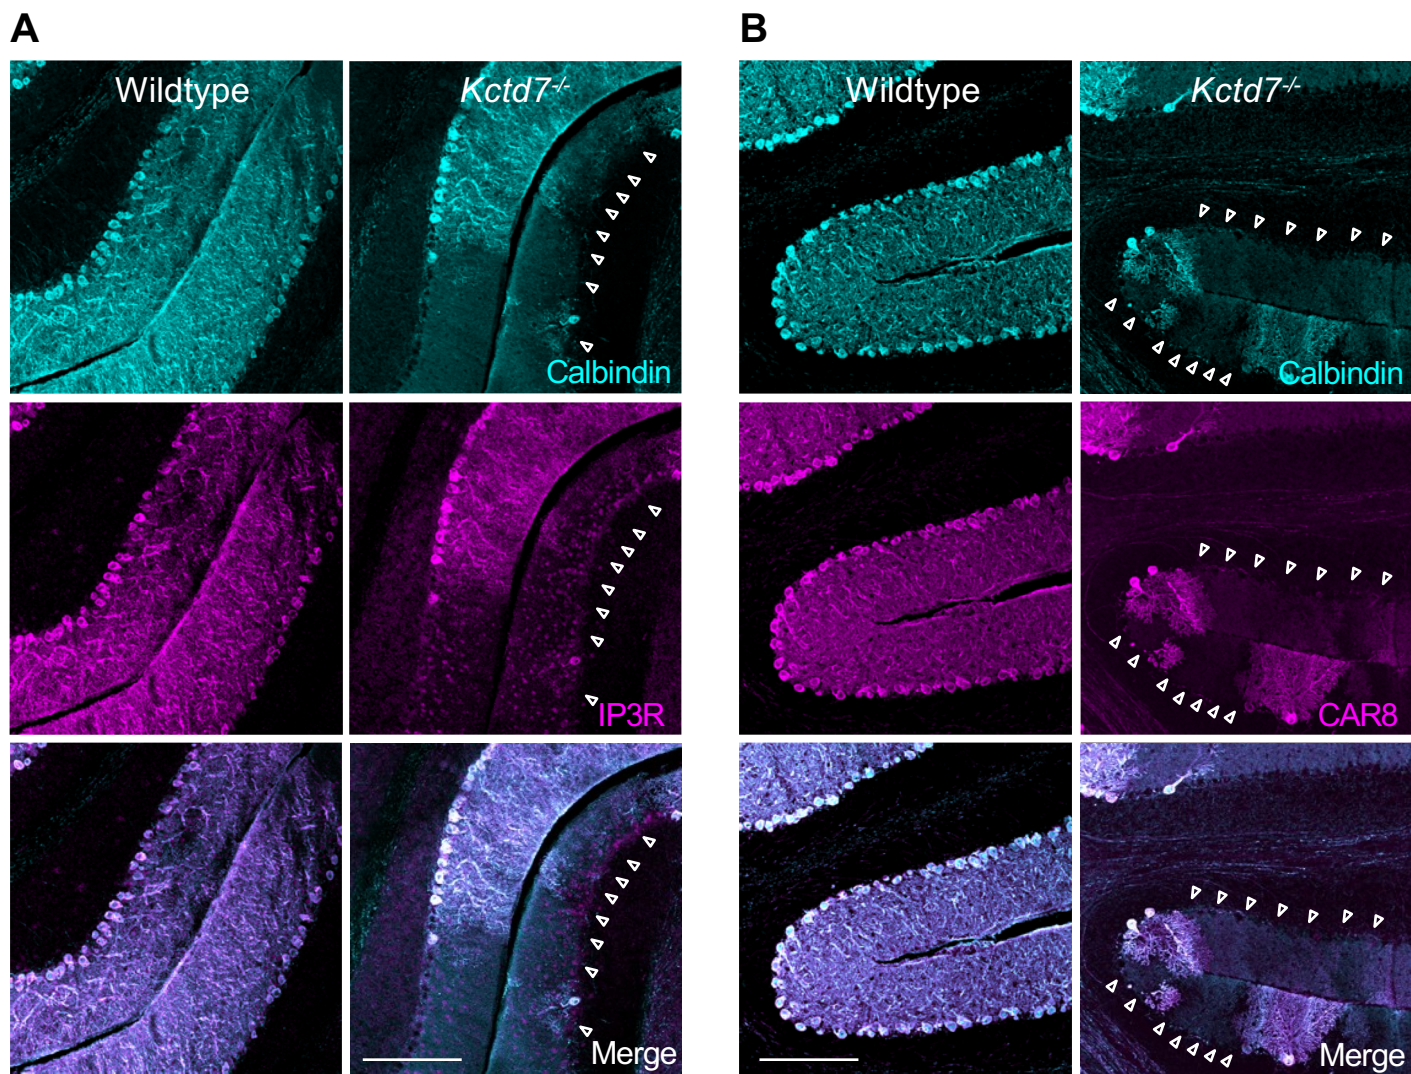

**Fig. S3. Labeling with additional Purkinje cell markers confirms cell loss in *Kctd7*<sup>-/-</sup> mice.** The presence and location of IP3R-positive and CAR8-positive Purkinje neurons were assayed by immunohistochemistry analysis in adult 2-month-old mice. These antibodies provide a Calbindin-independent method to visualize Purkinje neurons. In wild-type animals Purkinje neurons form a single and uniform layer present in each cerebellar lobule. In *Kctd7*<sup>-/-</sup> mice, clear loss of Purkinje neurons is apparent in as indicated by large gaps in the IP3R- and CAR8-positive layer (unfilled arrows). Scale bars = 200  $\mu$ m.

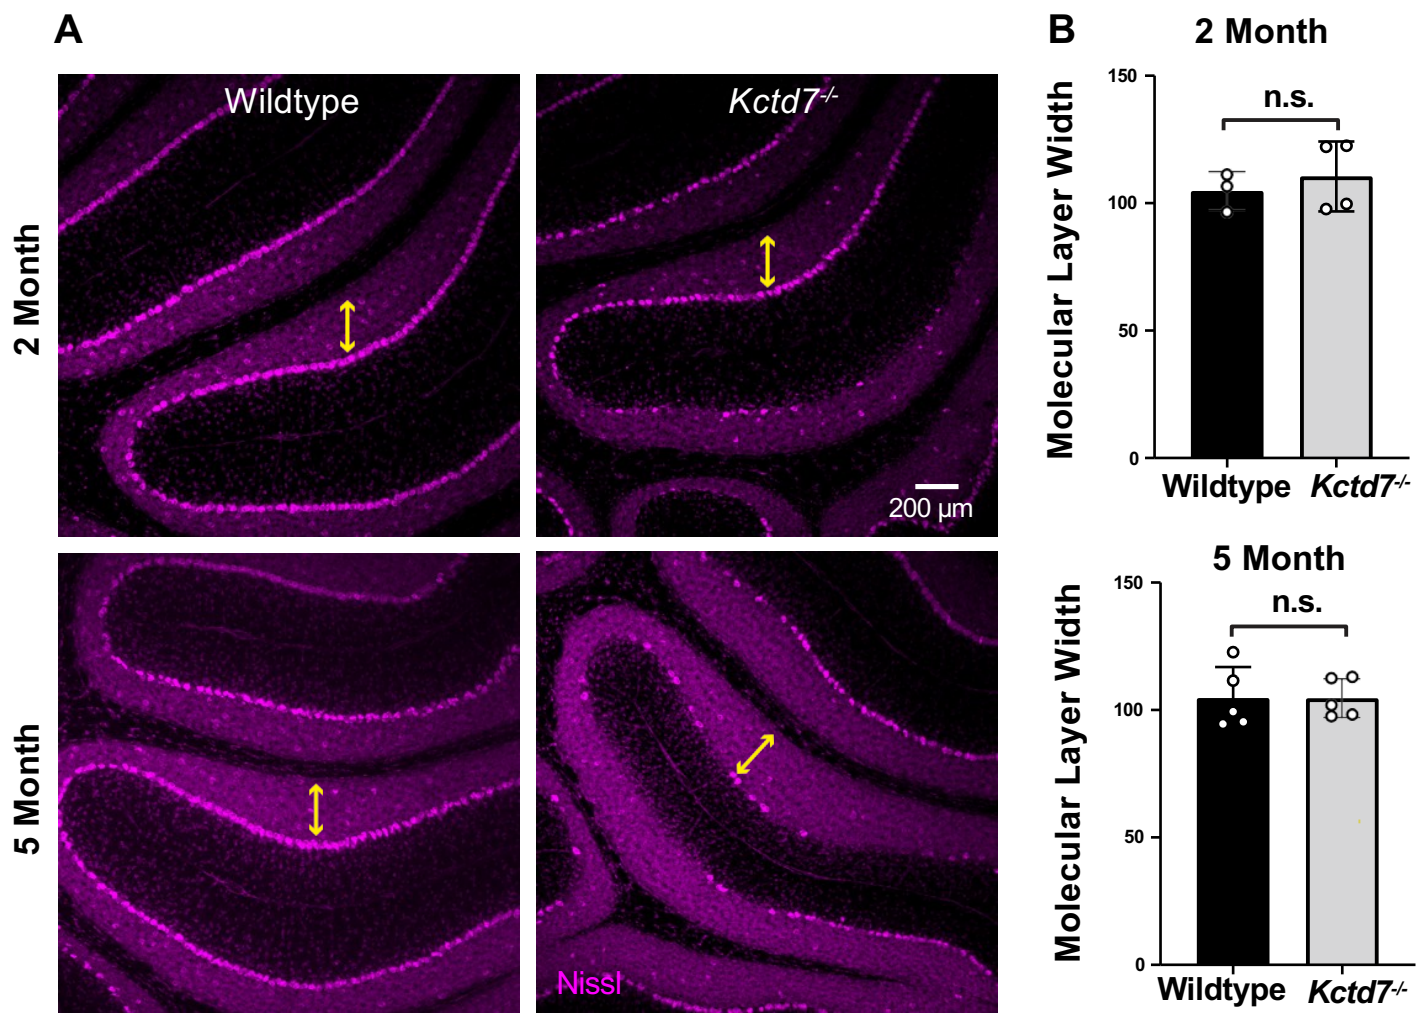

**Fig. S4. Cerebellar granular layer thickness does not change in the absence of Kctd7.** (A-B) The thickness of the granular layer was visualized (A) and measured (B) following Nissl staining in 2 and 5 month wild-type control (2-month  $n = 3$ , 5-month  $n = 5$ ) and *Kctd7*<sup>-/-</sup> mice (2-month  $n = 4$  and 5-month  $n = 5$ ) as a readout of cerebellar granule neuron number, size, and density. The molecular layer thickness was quantified from merged images (1272 μm x 1272 μm) using the average of 10 length measurements per lobe per animal at regions near the vermis. *Kctd7*-dependant alterations were not observed in the granular layer thickness. Scale bars = 200 μm. Data are represented as the mean ± the s.e.m, \*\*\*  $P < 0.001$ , \*\*  $P < 0.01$ , \*  $P < 0.05$ , unpaired t-test for significance (n.s. = not significant).

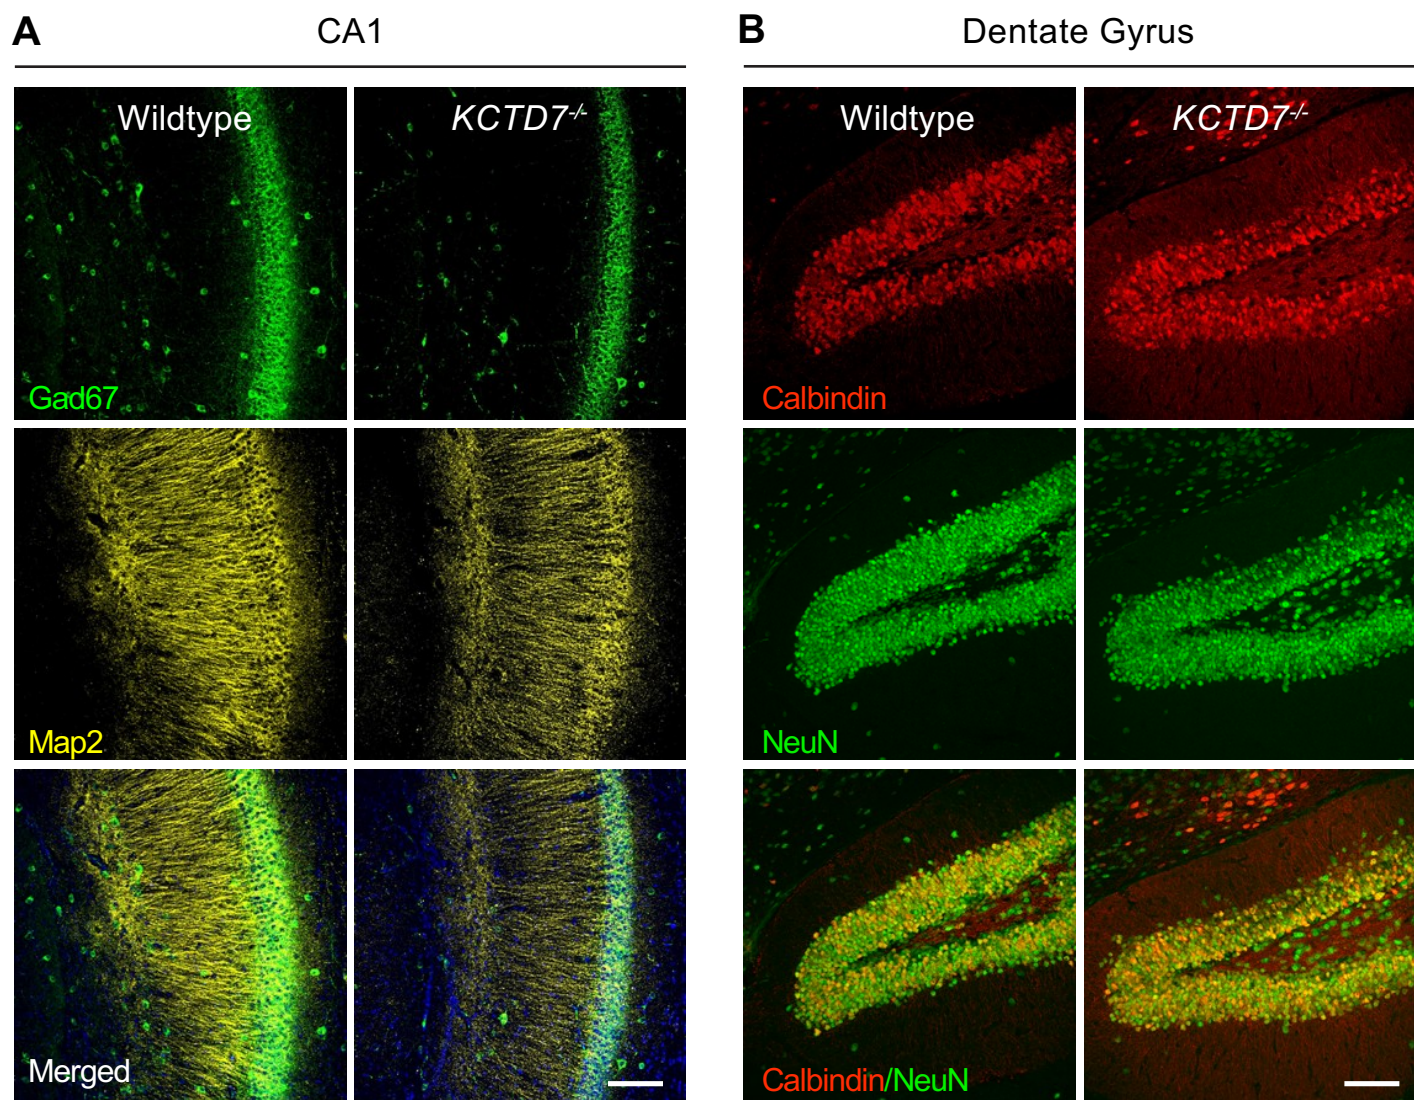

**Fig. S5. Hippocampal neurons appear largely normal in *Kctd7*<sup>-/-</sup> mice.** (A-B) The relative distribution and density of dentate gyrus granule cells, hilar interneurons, and CA1 pyramidal cells were examined in 2-month-old wild-type and *Kctd7*<sup>-/-</sup> animals by costaining for cell-type-specific markers. Grossly normal distribution of inhibitory GABAergic cells (Gad67) and all neurons (Map2) was observed in the CA1 region (A) of *Kctd7*<sup>-/-</sup> animals relative to wild-type controls. Similarly, staining for calbindin positive neuron subsets (calbindin) and all neurons (NeuN) in the dentate gyrus (B) did not show apparent defects in *Kctd7*<sup>-/-</sup> animals. Scale bar = 100  $\mu$ m.

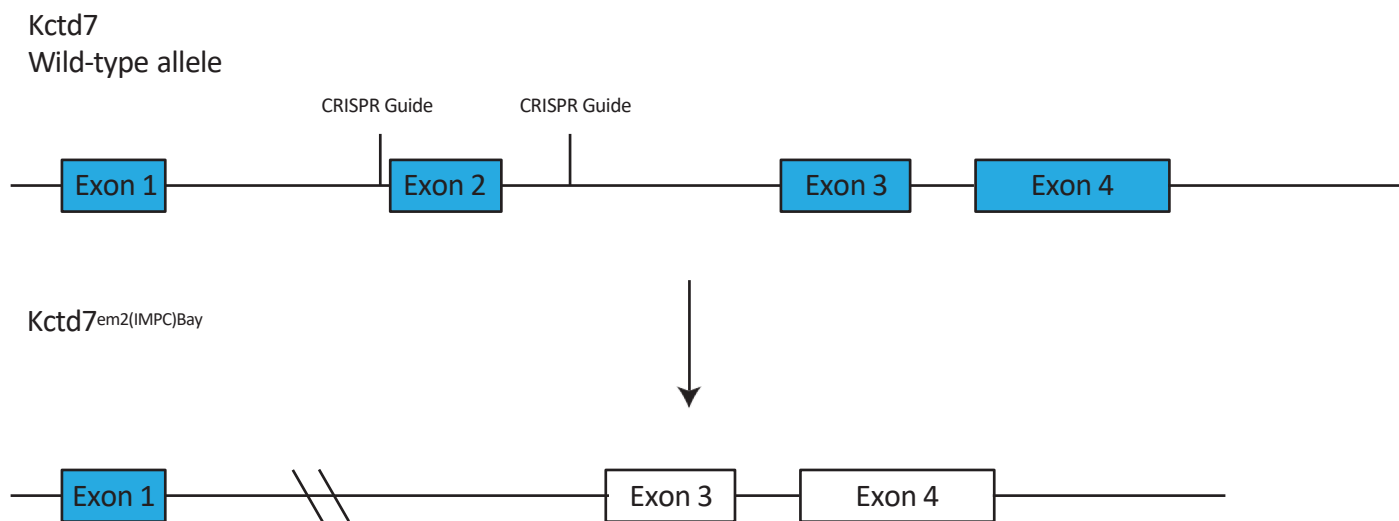

**Fig. S6. Allele schematic of *Kctd7*<sup>-/-</sup> line generation.** This mouse line was provided by the International Mouse Phenotyping Consortium (*Kctd7*<sup>em2(IMPC)Bay</sup>). The allele used in this study results in the deletion of Exon2, generating a truncated protein fragment that undergoes nonsense mediated decay.

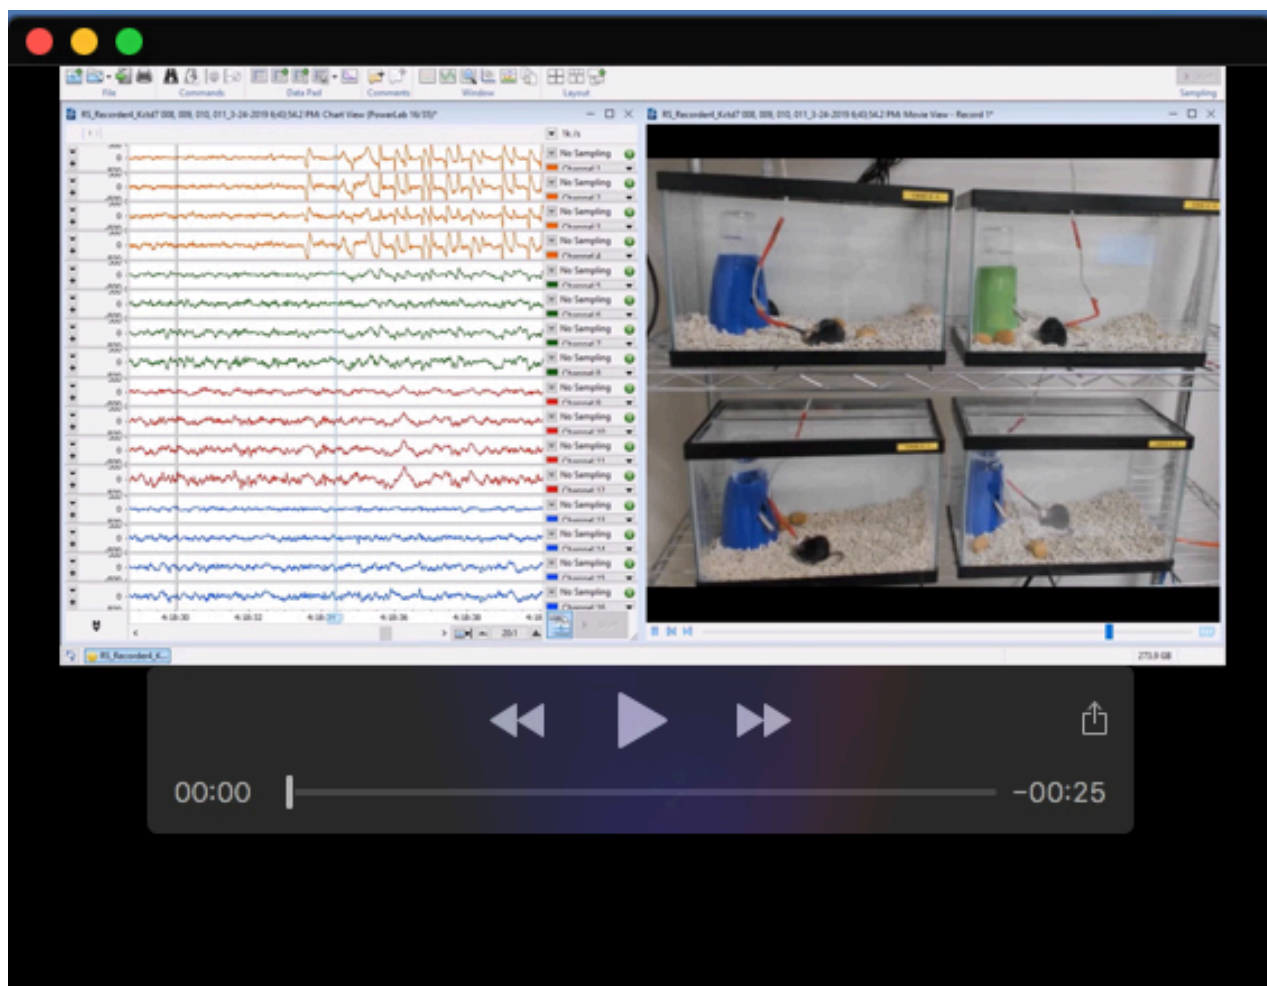

**Movie 1. Epileptiform activity in *Kctd7*-deficient mice.** Representative videos of EEG recording in wild-type control and *Kctd7*<sup>-/-</sup> animals. Among these mice, behavioral seizures were noted, consisting of high-frequency runs of spike discharges with a myoclonic head drop, followed in some instances by repetitive grooming movements of the forelimbs.
